# Supplementary material for: Arsenic Condensation and Reaction Mechanisms in Flash Smelting Off-Gas Line Conditions
Source: Springer Nature journal article supplement (doi:10.1007/s11663-023-02871-9), 2023-07-27
Supplement: MOESM1 [file 25856602]

Supplementary Material for:

Arsenic condensation and reaction mechanisms in Flash Smelting off-gas line conditions

Xingbang Wan<sup>1</sup>, Dmitry Sukhomlinov<sup>2</sup>, Pekka Taskinen<sup>2</sup>, Mari Lindgren<sup>3</sup>, Radoslaw Michallik<sup>4</sup> & Ari Jokilaakso<sup>2</sup>

<sup>1</sup> Central South University, School of Energy Science and Engineering, Changsha 410083, China

<sup>2</sup> Aalto University, School of Chemical Engineering, Department of Chemical and Metallurgical Engineering, PO Box 16100, FI-00076 Aalto, Finland

<sup>3</sup> Metso Outotec Finland Oy, Research Center, Kuparitie 10, FI-28330 Pori, Finland

<sup>4</sup> Geological Survey of Finland (GTK), Vuorimiehentie 2K, FI-02150, Espoo, Finland

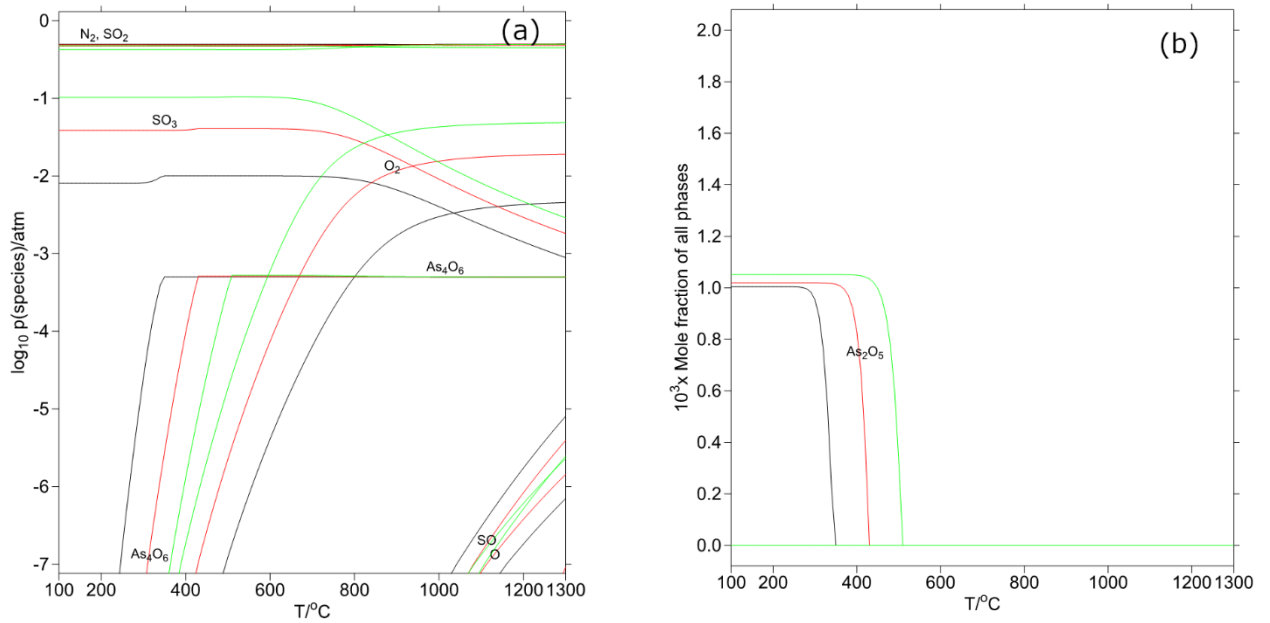

**Figure S-1.** The calculated equilibrium gas speciation (a) and amount of condensed phase (b) in the As-O-S-N<sub>2</sub> system in temperature range of 1300 to 100 °C with 0.5, 2 and 5 vol% O<sub>2</sub>, and 50 vol% SO<sub>2</sub>; the molar ratio of gas to As<sub>2</sub>O<sub>3</sub> in the initial mixture was 1000 and amount of gas 10 mol. The thermodynamic data were retrieved from MTOX database<sup>[1]</sup> and the calculations were carried out in the MTDATA environment<sup>[2]</sup> (0.5 vol% O<sub>2</sub> —, 2.0 vol% O<sub>2</sub> — and 5 vol% O<sub>2</sub> —).

**Table S-I.** The compositions of the arsenic dust samples at different oxygen partial pressure and temperature.

| No.                                                            | Temperature | Atmosphere                                                     | Phases<br>Arsenic compounds    | Phase composition(wt%) |            |            |           |
|----------------------------------------------------------------|-------------|----------------------------------------------------------------|--------------------------------|------------------------|------------|------------|-----------|
|                                                                |             |                                                                |                                | O                      | S          | As         | Ag        |
| Standard                                                       |             |                                                                | As                             | 0.0                    | 0.0        | 100        | 0.0       |
|                                                                |             |                                                                | As <sub>2</sub> O <sub>3</sub> | 24.3                   | 0.0        | 75.7       | 0.0       |
|                                                                |             |                                                                | As <sub>2</sub> O <sub>5</sub> | 34.8                   | 0.0        | 65.2       | 0.0       |
|                                                                |             |                                                                | AsS                            | 0.0                    | 29.9       | 70.1       | 0.0       |
|                                                                |             |                                                                | As <sub>2</sub> S <sub>3</sub> | 0.0                    | 39.1       | 60.9       | 0.0       |
| 50% SO <sub>2</sub> -49.5% N <sub>2</sub> -0.5% O <sub>2</sub> |             |                                                                |                                |                        |            |            |           |
| As-1                                                           | 38~107 °C   | 50% SO <sub>2</sub> -49.5% N <sub>2</sub> -0.5% O <sub>2</sub> | Arsenic oxide                  | 24.8 ± 1.2             | 0.1 ± 0.2  | 73.3 ± 0.8 | 1.8 ± 0.1 |
|                                                                |             |                                                                | Arsenic                        | 0.2 ± 0.3              | 0.2 ± 0.2  | 96.1 ± 1.5 | 3.4 ± 0.1 |
| As-2                                                           | 107~133 °C  | 50% SO <sub>2</sub> -49.5% N <sub>2</sub> -0.5% O <sub>2</sub> | Arsenic oxide                  | 24.7 ± 0.9             | 0.2 ± 0.2  | 73.4 ± 0.9 | 1.7 ± 0.1 |
|                                                                |             |                                                                | Arsenic                        | 0.3 ± 0.2              | 0.1 ± 0.0  | 96.1 ± 1.0 | 3.4 ± 0.1 |
|                                                                |             |                                                                | Arsenic sulphide               | 0.3 ± 0.1              | 14.3 ± 1.8 | 82.7 ± 0.9 | 2.7 ± 0.1 |
|                                                                |             |                                                                | Arsenic sulphide               | 0.3 ± 0.1              | 18.7 ± 5.3 | 77.6 ± 5.0 | 2.5 ± 0.3 |
|                                                                |             |                                                                | Arsenic oxide                  | 24.1 ± 0.9             | 0.0 ± 0.9  | 74.0 ± 1.5 | 1.8 ± 0.1 |
| As-3                                                           | 133~158 °C  | 50% SO <sub>2</sub> -49.5% N <sub>2</sub> -0.5% O <sub>2</sub> | Arsenic                        | 0.5 ± 0.2              | 0.1 ± 0.1  | 96.0 ± 1.9 | 3.4 ± 0.1 |
|                                                                |             |                                                                | Arsenic sulphide               | 0.0 ± 0.9              | 12.1 ± 0.3 | 85.0 ± 2.7 | 2.9 ± 0.2 |
|                                                                |             |                                                                | Arsenic oxide                  | 24.5 ± 0.2             | 0.0 ± 0.0  | 73.8 ± 0.2 | 1.8 ± 0.1 |
| As-4                                                           | 158~187 °C  | 50% SO <sub>2</sub> -49.5% N <sub>2</sub> -0.5% O <sub>2</sub> | Arsenic                        | 0.4 ± 0.3              | 0.4 ± 0.1  | 95.8 ± 1.3 | 3.4 ± 0.1 |
|                                                                |             |                                                                | Arsenic sulphide               | 0.6 ± 0.4              | 12.0 ± 0.3 | 84.7 ± 3.8 | 2.7 ± 0.4 |
|                                                                |             |                                                                | Arsenic oxide                  | 23.3 ± 0.7             | 0.0 ± 0.0  | 74.8 ± 0.1 | 1.8 ± 0.0 |
| As-5                                                           | 187~222 °C  | 50% SO <sub>2</sub> -49.5% N <sub>2</sub> -0.5% O <sub>2</sub> | Arsenic                        | 0.6 ± 0.0              | 0.9 ± 0.4  | 95.1 ± 1.1 | 3.3 ± 0.1 |
|                                                                |             |                                                                | Arsenic sulphide               | 0.0 ± 0.0              | 11.2 ± 2.3 | 85.9 ± 4.2 | 2.9 ± 0.3 |
|                                                                |             |                                                                | Arsenic oxide                  | 24.3 ± 0.8             | 0.0 ± 0.0  | 73.9 ± 1.0 | 1.8 ± 0.0 |
| As-6                                                           | 222~239 °C  | 50% SO <sub>2</sub> -49.5% N <sub>2</sub> -0.5% O <sub>2</sub> | Arsenic                        | 0.2 ± 0.4              | 0.4 ± 0.3  | 95.9 ± 0.6 | 3.5 ± 0.5 |
|                                                                |             |                                                                | Arsenic sulphide               | 0.1 ± 0.2              | 15.0 ± 5.3 | 82.2 ± 6.7 | 2.8 ± 0.4 |
|                                                                |             |                                                                | Arsenic                        | 0.3 ± 0.0              | 0.0 ± 0.0  | 96.3 ± 0.8 | 3.4 ± 0.1 |
| 50% SO <sub>2</sub> -48% N <sub>2</sub> -2 % O <sub>2</sub>    |             |                                                                |                                |                        |            |            |           |
| As-8                                                           | 31~38 °C    | 50% SO <sub>2</sub> -49.5% N <sub>2</sub> -2 % O <sub>2</sub>  | Arsenic oxide                  | 23.8 ± 1.5             | 0.0 ± 0.0  | 74.3 ± 2.5 | 1.8 ± 0.1 |
|                                                                |             |                                                                | Arsenic sulphide               | 0.1 ± 0.2              | 27.2 ± 5.2 | 70.7 ± 5.0 | 1.9 ± 0.5 |
| As-9                                                           | 38~60 °C    | 50% SO <sub>2</sub> -49.5% N <sub>2</sub> -2 % O <sub>2</sub>  | Arsenic oxide                  | 24.4 ± 0.7             | 0.1 ± 0.0  | 73.8 ± 1.6 | 1.8 ± 0.1 |
|                                                                |             |                                                                | Arsenic                        | 0.0 ± 0.0              | 0.3 ± 0.0  | 96.3 ± 4.3 | 3.4 ± 0.3 |

|                                                              |            |                                                                |                  |            |            |            |           |
|--------------------------------------------------------------|------------|----------------------------------------------------------------|------------------|------------|------------|------------|-----------|
| As-10                                                        | 60~87 °C   | 50% SO <sub>2</sub> -49.5% N <sub>2</sub> -2 % O <sub>2</sub>  | Arsenic sulphide | 1.9 ± 0.2  | 26.2 ± 3.4 | 70.0 ± 5.2 | 1.9 ± 0.2 |
|                                                              |            |                                                                | Arsenic oxide    | 23.7 ± 2.3 | 0.4 ± 0.8  | 74.0 ± 2.2 | 1.8 ± 0.1 |
|                                                              |            |                                                                | Arsenic          | 0.6 ± 0.3  | 0.5 ± 0.1  | 95.6 ± 3.8 | 3.3 ± 0.3 |
| As-11                                                        | 87~107 °C  | 50% SO <sub>2</sub> -49.5% N <sub>2</sub> -2 % O <sub>2</sub>  | Arsenic sulphide | 11.8 ± 0.4 | 14.1 ± 0.9 | 68.1 ± 0.8 | 1.0 ± 0.0 |
|                                                              |            |                                                                | Arsenic oxide    | 23.6 ± 0.7 | 0.0 ± 0.4  | 74.5 ± 0.6 | 1.8 ± 0.1 |
|                                                              |            |                                                                | Arsenic          | 0.3 ± 0.4  | 0.2 ± 0.2  | 96.2 ± 4.0 | 3.4 ± 0.2 |
| As-12                                                        | 107~133 °C | 50% SO <sub>2</sub> -49.5% N <sub>2</sub> -2 % O <sub>2</sub>  | Arsenic sulphide | 0.4 ± 0.4  | 28.8 ± 3.9 | 68.9 ± 4.4 | 1.9 ± 0.5 |
|                                                              |            |                                                                | Arsenic oxide    | 23.1 ± 0.8 | 0.0 ± 0.0  | 75.1 ± 0.6 | 1.8 ± 0.1 |
|                                                              |            |                                                                | Arsenic          | 0.7 ± 0.1  | 0.1 ± 0.1  | 95.9 ± 1.9 | 3.3 ± 0.1 |
| As-13                                                        | 133~158 °C | 50% SO <sub>2</sub> -49.5% N <sub>2</sub> -2 % O <sub>2</sub>  | Arsenic oxide    | 24.2 ± 0.7 | 0.1 ± 0.1  | 73.9 ± 0.8 | 1.8 ± 0.1 |
|                                                              |            |                                                                | Arsenic          | 0.8 ± 0.3  | 0.2 ± 0.1  | 95.6 ± 1.4 | 3.4 ± 0.1 |
|                                                              |            |                                                                | Arsenic sulphide | 1.5 ± 0.2  | 28.5 ± 3.3 | 67.9 ± 4.9 | 2.1 ± 0.3 |
| As-14                                                        | 158~187 °C | 50% SO <sub>2</sub> -49.5% N <sub>2</sub> -2 % O <sub>2</sub>  | Arsenic oxide    | 24.4 ± 1.7 | 0.3 ± 0.2  | 73.6 ± 3.5 | 1.7 ± 0.2 |
|                                                              |            |                                                                | Arsenic          | 0.4 ± 0.1  | 0.4 ± 0.3  | 95.9 ± 2.9 | 3.3 ± 0.2 |
|                                                              |            |                                                                | Arsenic sulphide | 0.0 ± 0.0  | 7.4 ± 0.1  | 89.9 ± 4.9 | 2.7 ± 0.4 |
| As-15                                                        | 187~222 °C | 50% SO <sub>2</sub> -49.5% N <sub>2</sub> -2 % O <sub>2</sub>  | Arsenic sulphide | 1.9 ± 1.3  | 37.7 ± 3.2 | 58.3 ± 3.8 | 1.7 ± 0.2 |
| 50% SO <sub>2</sub> - 45% N <sub>2</sub> -5 % O <sub>2</sub> |            |                                                                |                  |            |            |            |           |
| As-16                                                        | 38~ 60 °C  | 50% SO <sub>2</sub> - 49.5% N <sub>2</sub> -5 % O <sub>2</sub> | Arsenic oxide    | 23.8 ± 1.7 | 0.0 ± 0.0  | 73.5 ± 3.5 | 1.8 ± 0.2 |
|                                                              |            |                                                                | Arsenic          | 0.1 ± 0.3  | 0.6 ± 0.3  | 95.9 ± 1.7 | 3.4 ± 0.1 |
|                                                              |            |                                                                | Arsenic sulphide | 0.0 ± 0.0  | 4.7 ± 0.0  | 92.1 ± 2.8 | 3.1 ± 0.2 |
| As-17                                                        | 60~87 °C   | 50% SO <sub>2</sub> - 49.5% N <sub>2</sub> -5 % O <sub>2</sub> | Arsenic oxide    | 24.7 ± 1.6 | 0.1 ± 0.0  | 72.8 ± 1.4 | 1.7 ± 0.1 |
|                                                              |            |                                                                | Arsenic          | 0.4 ± 0.1  | 0.8 ± 0.4  | 95.5 ± 3.8 | 3.2 ± 0.3 |
| As-18                                                        | 87~107 °C  | 50% SO <sub>2</sub> - 49.5% N <sub>2</sub> -5 % O <sub>2</sub> | Arsenic oxide    | 25.1 ± 1.0 | 0.1 ± 0.0  | 72.2 ± 1.0 | 1.8 ± 0.1 |
|                                                              |            |                                                                | Arsenic          | 0.1 ± 0.3  | 0.7 ± 0.1  | 95.6 ± 1.4 | 3.5 ± 0.1 |
| As-19                                                        | 107~133 °C | 50% SO <sub>2</sub> - 49.5% N <sub>2</sub> -5 % O <sub>2</sub> | Arsenic oxide    | 24.1 ± 1.0 | 0.1 ± 0.0  | 73.3 ± 1.2 | 1.8 ± 0.1 |
|                                                              |            |                                                                | Arsenic          | 0.6 ± 0.1  | 0.3 ± 0.1  | 95.7 ± 2.5 | 3.4 ± 0.2 |
| As-20                                                        | 133~158 °C | 50% SO <sub>2</sub> - 49.5% N <sub>2</sub> -5 % O <sub>2</sub> | Arsenic oxide    | 24.0 ± 1.3 | 0.1 ± 0.0  | 73.5 ± 1.4 | 1.8 ± 0.1 |
|                                                              |            |                                                                | Arsenic          | 0.7 ± 0.1  | 0.6 ± 0.2  | 95.3 ± 0.9 | 3.4 ± 0.1 |
|                                                              |            |                                                                | Arsenic sulphide | 0.0 ± 0.1  | 7.7 ± 0.4  | 89.1 ± 1.7 | 3.2 ± 0.1 |
| As-21                                                        | 158~187 °C | 50% SO <sub>2</sub> - 49.5% N <sub>2</sub> -5 % O <sub>2</sub> | Arsenic oxide    | 22.6 ± 1.1 | 0.3 ± 0.1  | 74.5 ± 0.1 | 1.9 ± 0.1 |
|                                                              |            |                                                                | Arsenic          | 0.8 ± 0.1  | 0.3 ± 0.1  | 95.6 ± 1.5 | 3.4 ± 0.1 |
|                                                              |            |                                                                | Arsenic sulphide | 0.2 ± 0.4  | 6.7 ± 0.2  | 89.9 ± 1.4 | 3.2 ± 0.2 |
| As-22                                                        | 187~222 °C | 50% SO <sub>2</sub> - 49.5% N <sub>2</sub> -5 % O <sub>2</sub> | Arsenic oxide    | 23.7 ± 0.1 | 0.0 ± 0.0  | 73.7 ± 0.3 | 1.8 ± 0.1 |
|                                                              |            |                                                                | Arsenic          | 0.5 ± 0.1  | 0.6 ± 0.2  | 95.5 ± 3.5 | 3.4 ± 0.2 |

**Table S-II.** The average compositions of metal, oxide and sulphide phases in the deposits measured with EDS (non-normalised after matrix correction).

| Compounds                | Average phase composition (wt%) |             |             |
|--------------------------|---------------------------------|-------------|-------------|
|                          | O                               | S           | As          |
| Arsenic                  |                                 |             |             |
| 0.5 % vol O <sub>2</sub> | 0.4 ± 0.2                       | 0.3 ± 0.3   | 95.9 ± 0.4  |
| 2.0% vol O <sub>2</sub>  | 0.5 ± 0.3                       | 0.3 ± 0.1   | 95.9 ± 0.3  |
| 5.0 % vol O <sub>2</sub> | 0.4 ± 0.2                       | 0.0 ± 0.0   | 95.6 ± 0.2  |
| Arsenic oxide            |                                 |             |             |
| 0.5 % vol O <sub>2</sub> | 24.3 ± 0.5                      | 0.1 ± 0.1   | 73.9 ± 0.5  |
| 2.0 % vol O <sub>2</sub> | 23.9 ± 0.5                      | 0.1 ± 0.2   | 74.2 ± 0.5  |
| 5.0 % vol O <sub>2</sub> | 24.0 ± 0.8                      | 0.8 ± 0.1   | 73.3 ± 0.7  |
| Arsenic sulphide         |                                 |             |             |
| 0.5 % vol O <sub>2</sub> | 0.4 ± 0.5                       | 13.9 ± 2.8  | 83.0 ± 3.0  |
| 2.0 % vol O <sub>2</sub> | 1.0 ± 0.9                       | 26.0 ± 10.0 | 70.9 ± 10.3 |
| 5.0 % vol O <sub>2</sub> | 0.1 ± 0.1                       | 6.3 ± 1.5   | 90.4 ± 1.6  |

**Table S-III.** The average compositions of metal, oxide and sulphide phases in the deposits measured with EPMA (non-normalised after matrix correction).

| Sample#<br>(phase) | Wt%         |             |            |      |             |
|--------------------|-------------|-------------|------------|------|-------------|
|                    | O           | S           | As         | Ag   | Total       |
| 3(1)               | 25.9 ± 0.3  | 0.01 ± 0.01 | 74.2 ± 0.5 | 0.00 | 100.2 ± 0.6 |
| 3(2)               | 0.19 ± 0.1  | 15.3 ± 1.1  | 84.2 ± 1.2 | 0.00 | 99.6 ± 0.3  |
| 3(3)               | 0.17 ± 0.02 | 0.14 ± 0.03 | 99.1 ± 0.5 | 0.00 | 99.4 ± 0.5  |
| 7(1)               | 1.3 ± 0.3   | 0.07 ± 0.03 | 98.6 ± 0.3 | 0.00 | 100.0 ± 0.2 |
| 13(1)              | 25.5 ± 0.7  | 0.0 ± 0.0   | 74.2 ± 0.9 | 0.00 | 99.7 ± 0.8  |
| 13(2)              | 0.2 ± 0.04  | 0.22 ± 0.1  | 98.6 ± 0.6 | 0.00 | 99.0 ± 0.6  |
| 13(3)              | 0.7 ± 0.2   | 37.5 ± 0.1  | 61.4 ± 0.7 | 0.01 | 99.7 ± 0.6  |
| 15(1)              | 0.3 ± 0.06  | 41.1 ± 1.0  | 55.8 ± 0.4 | 0.00 | 97.2 ± 1.2  |
| 20(1)              | 25.1 ± 0.4  | 0.0 ± 0.0   | 74.9 ± 0.3 | 0.00 | 100.0 ± 0.2 |
| 20(2)              | 0.2 ± 0.04  | 0.4 ± 0.4   | 98.4 ± 1.0 | 0.01 | 99.0 ± 0.6  |
| 22(1)              | 0.2 ± 0.02  | 0.5 ± 0.1   | 96.6 ± 1.0 | 0.00 | 97.4 ± 0.7  |
| 22(2)              | 25.7 ± 0.6  | 0.0 ± 0.0   | 72.8 ± 0.2 | 0.00 | 98.5 ± 0.5  |



## Figures S-2.

The obtained XPS spectra and their fitted components for the samples at different temperatures and in different atmospheres; the S 2p spectra have been reproduced without individual points for clarity.

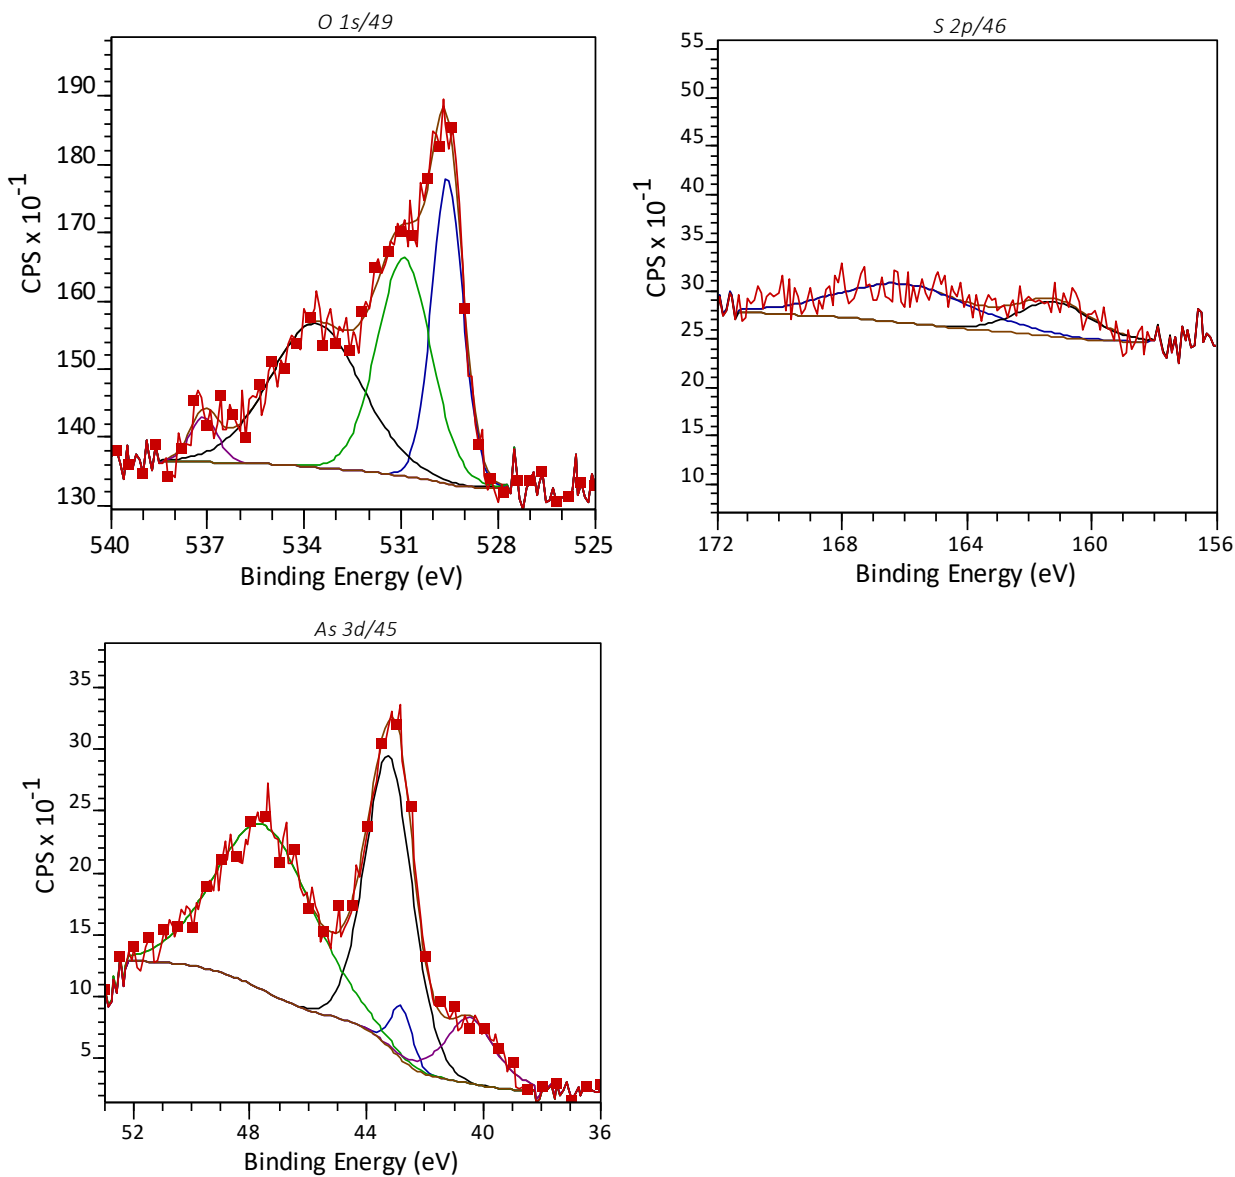

(a) Sample #3 – 0.5 % O<sub>2</sub>-50 % SO<sub>2</sub>; t = 133-158 °C.

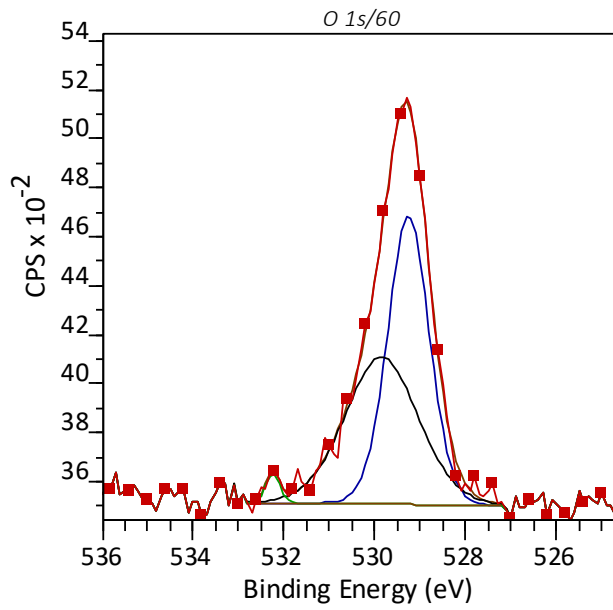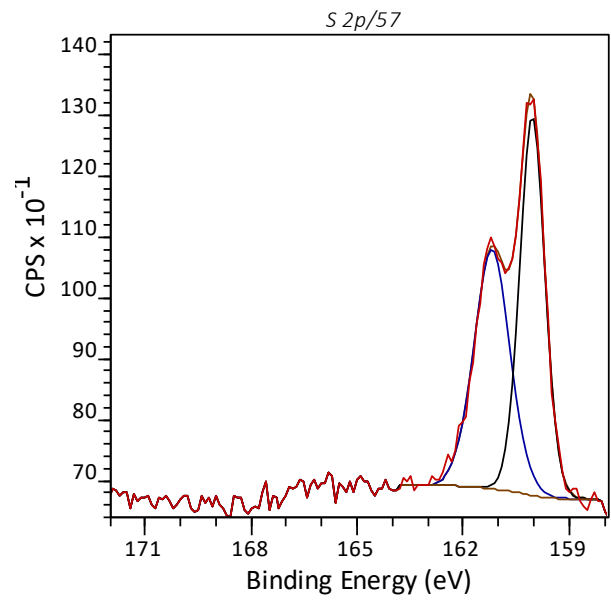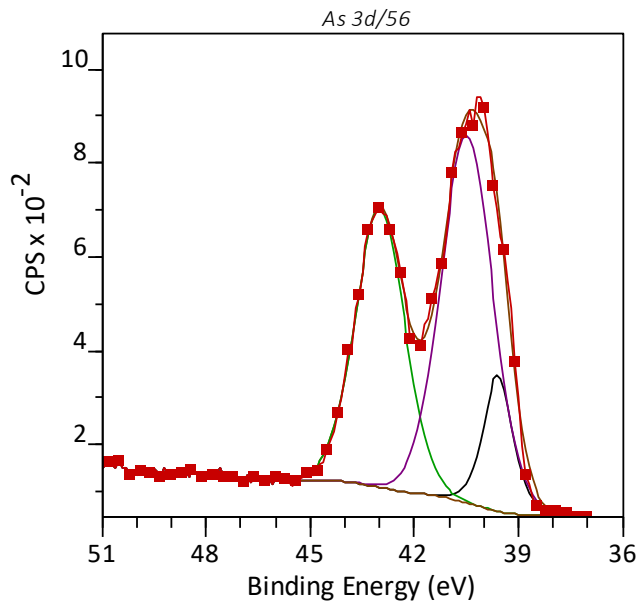

(b) Sample #4 – 0.5 % O<sub>2</sub>-50 % SO<sub>2</sub>; t = 158-187 °C.



Not available due to low S:N ratio.

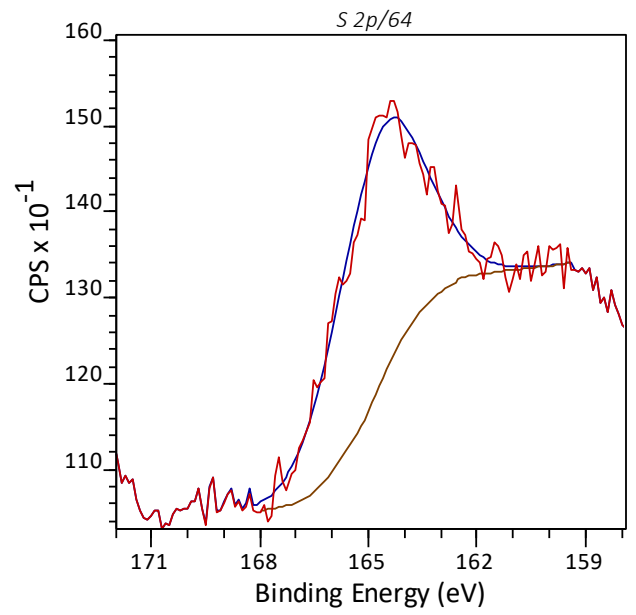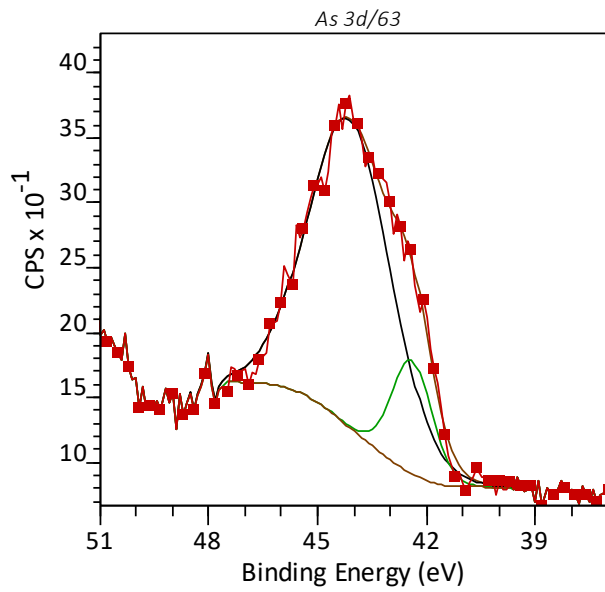

(c) Sample #5 – 0.5 % O<sub>2</sub>-50 % SO<sub>2</sub>; t = 187-222 °C.

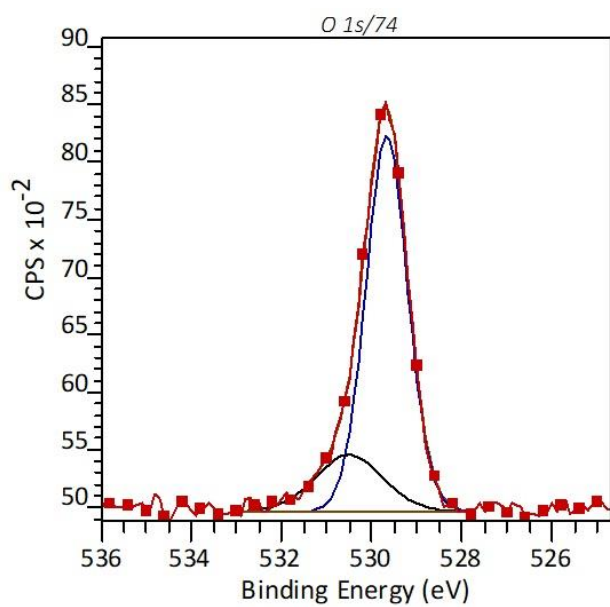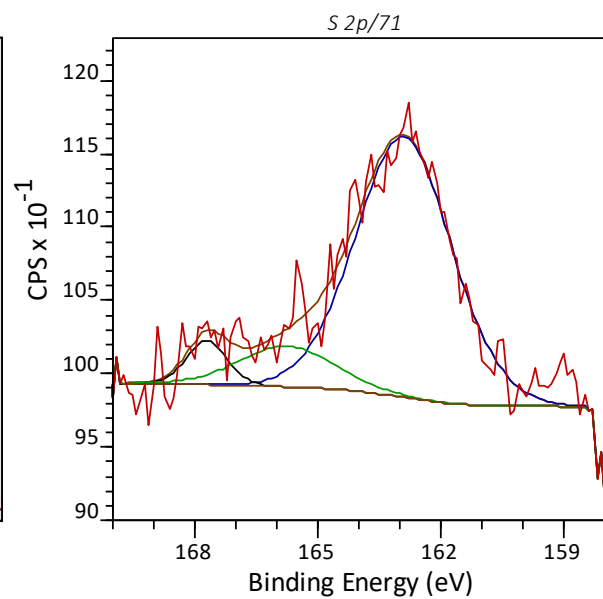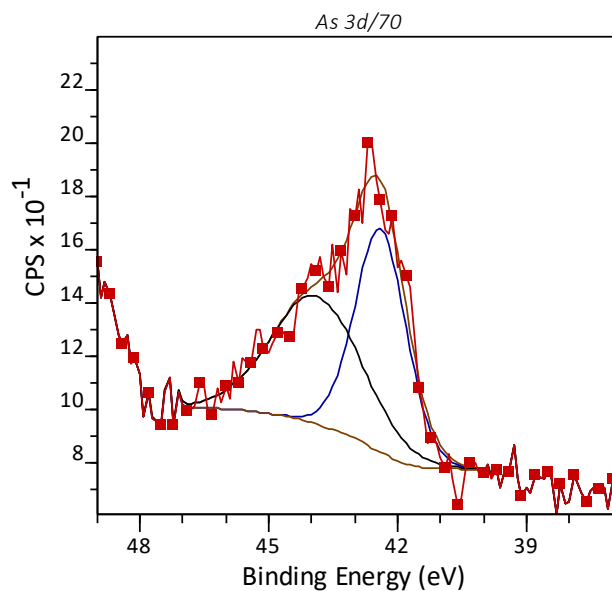

(d) Sample #6 – 0.5 % O<sub>2</sub>-50 % SO<sub>2</sub>; t = 222- 239 °C.

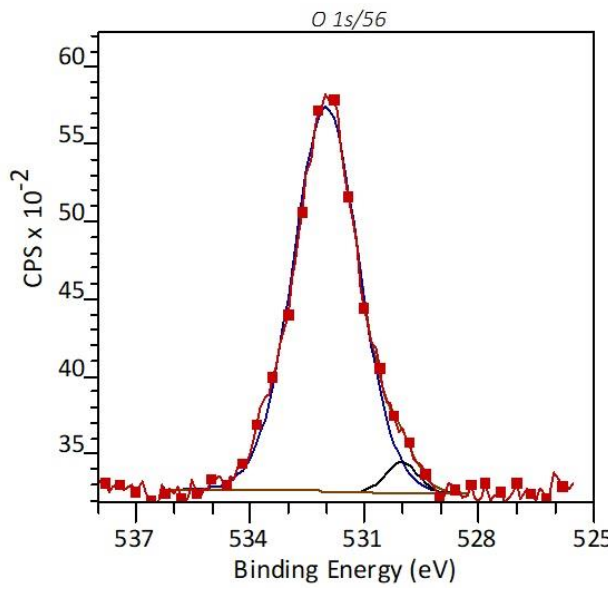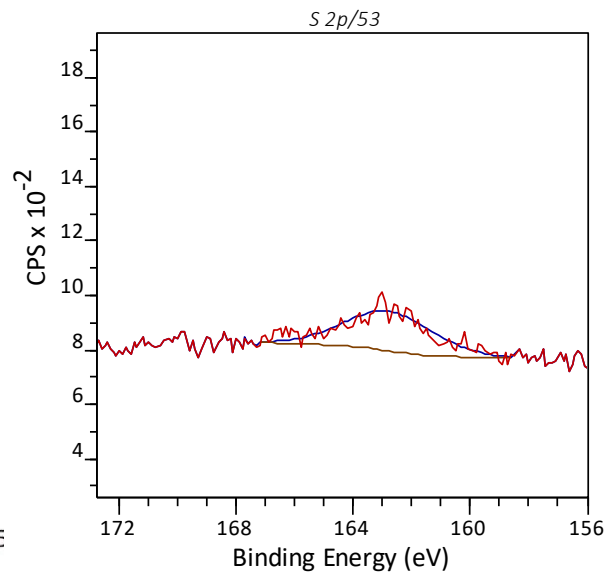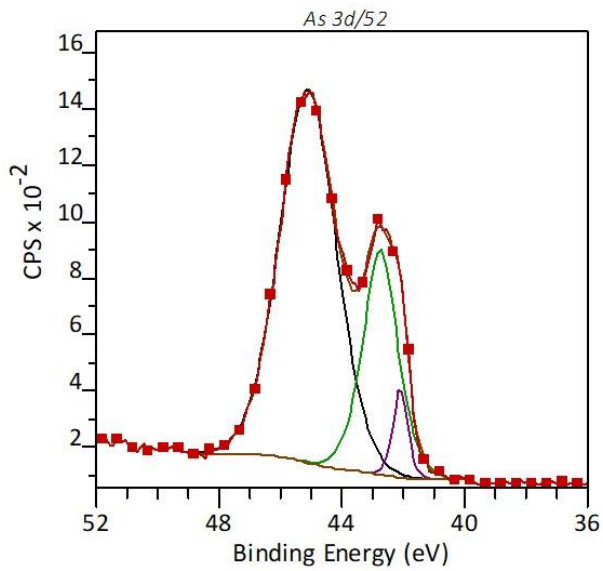

(e) Sample #7 – 0.5 % O<sub>2</sub>-50 % SO<sub>2</sub>; t = 239-286 °C.

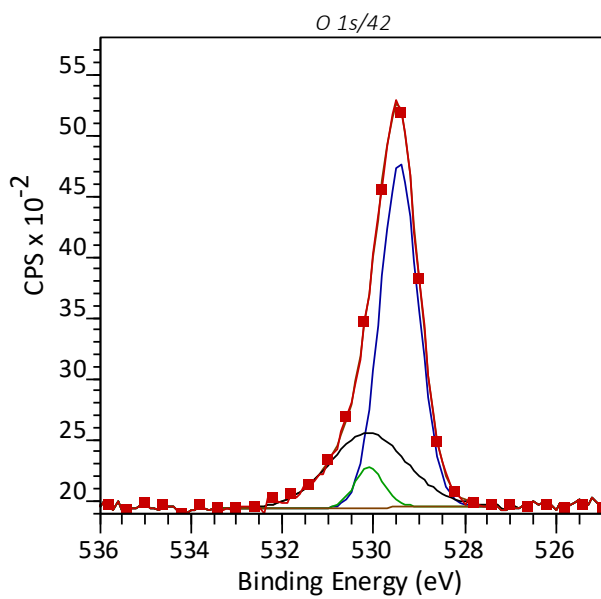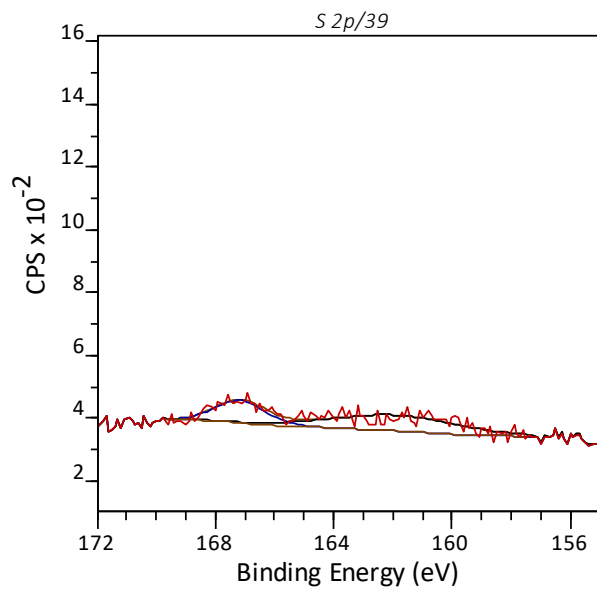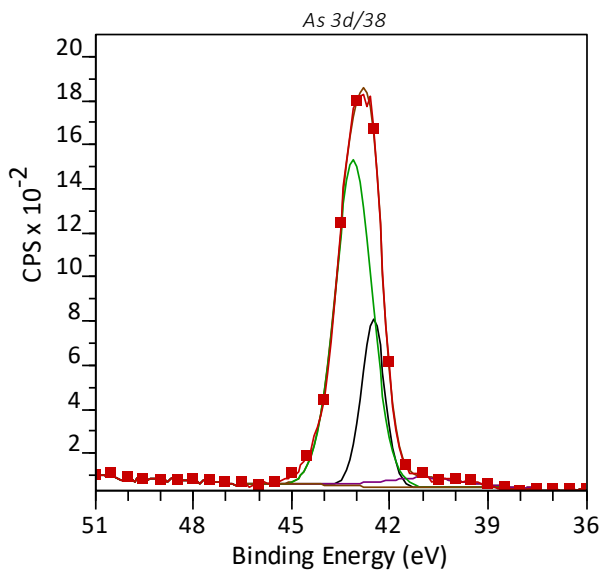

(f) Sample ABC – 2.0 % O<sub>2</sub>-50 % SO<sub>2</sub>; t = 87-107 °C.

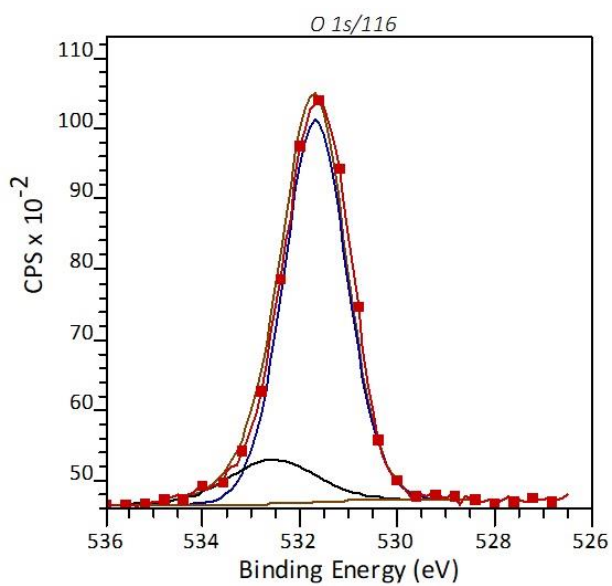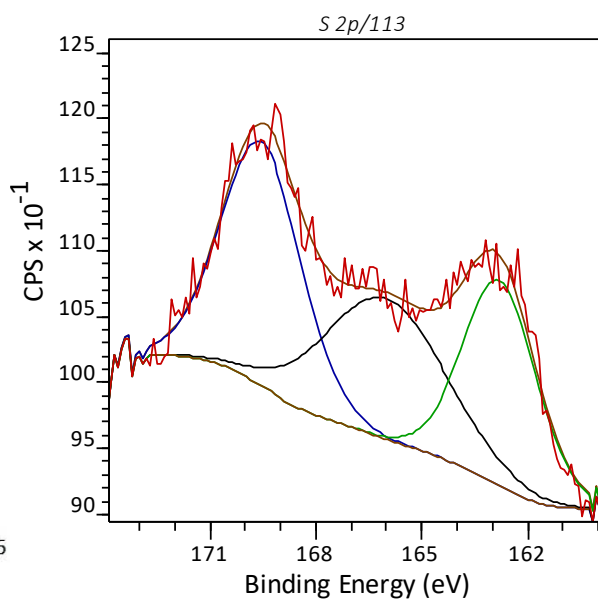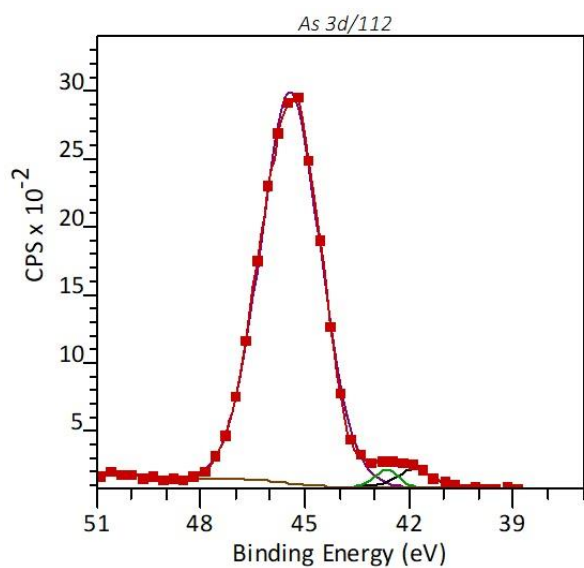

(g) Sample DEF – 2.0 % O<sub>2</sub>-50 % SO<sub>2</sub>; t = 107-133 °C.

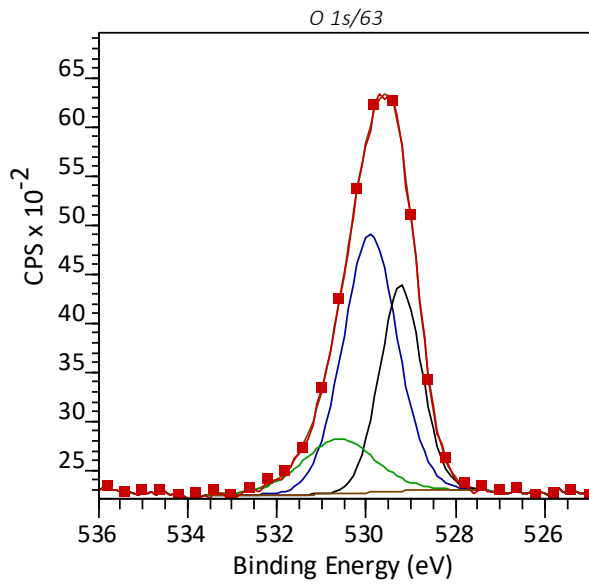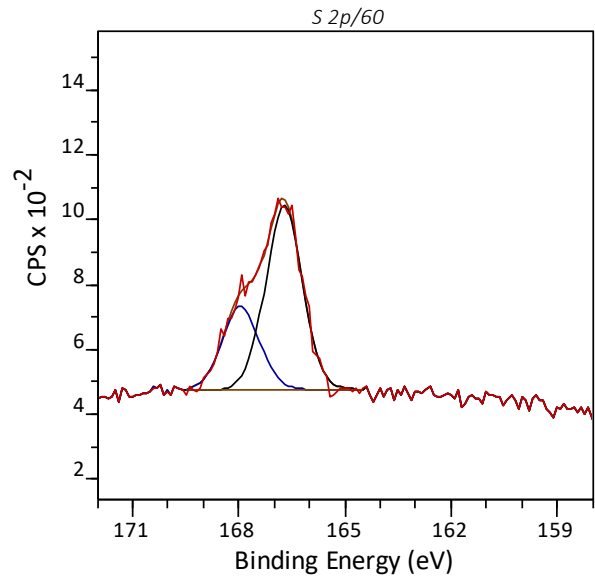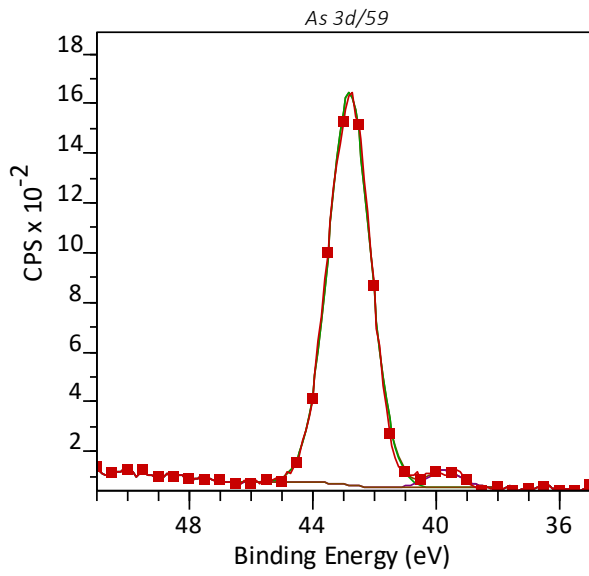

(h) Sample #13 – 2.0 % O<sub>2</sub>-50 % SO<sub>2</sub>; t = 133-158 °C.

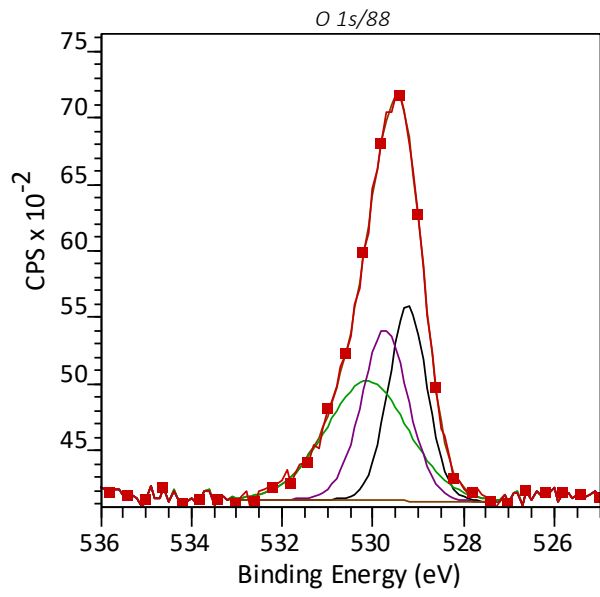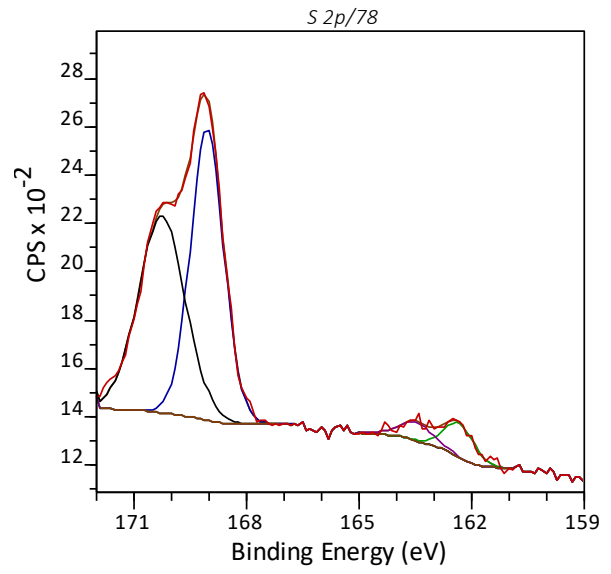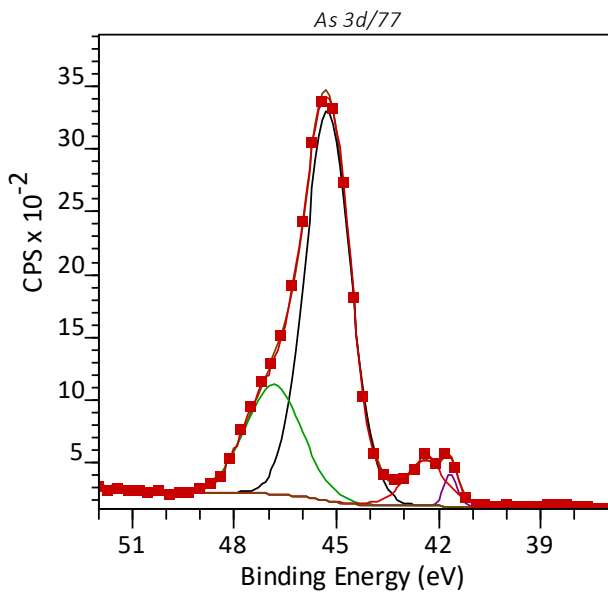

(i) Sample #14 – 2.0 % O<sub>2</sub>-50 % SO<sub>2</sub>; t = 158 -187 °C.

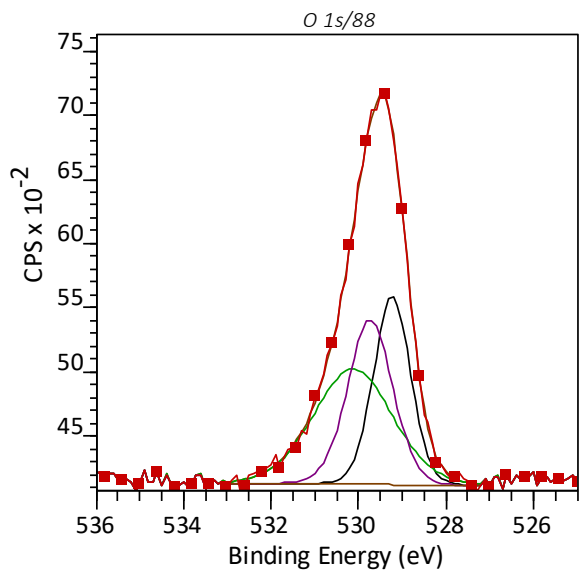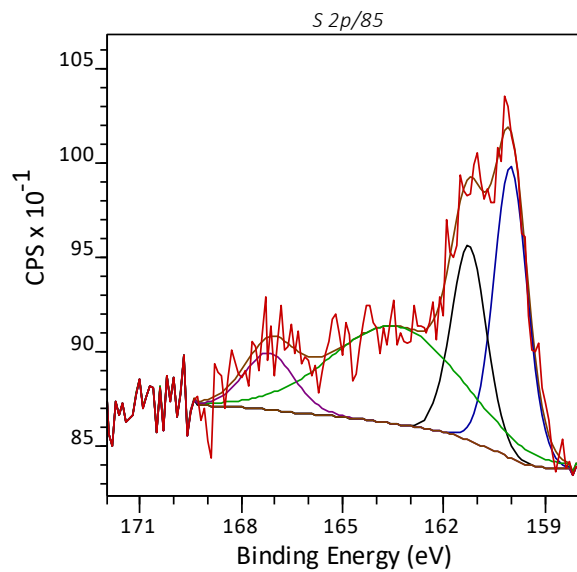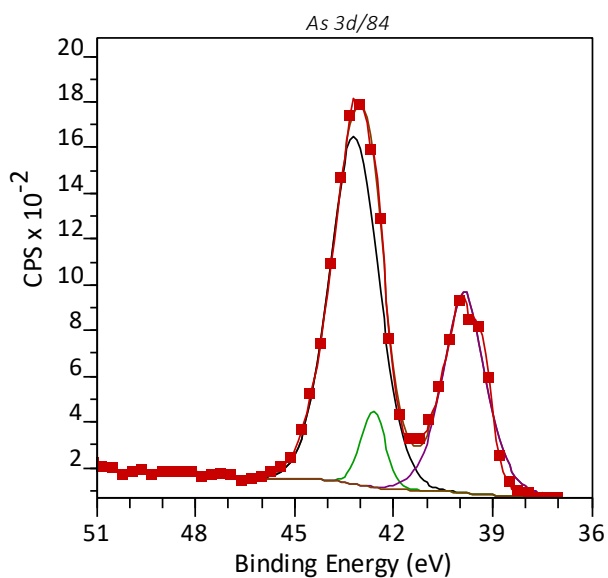

(j) Sample #18 – 5.0 % O<sub>2</sub>-50 % SO<sub>2</sub>; t = 87-107 °C.



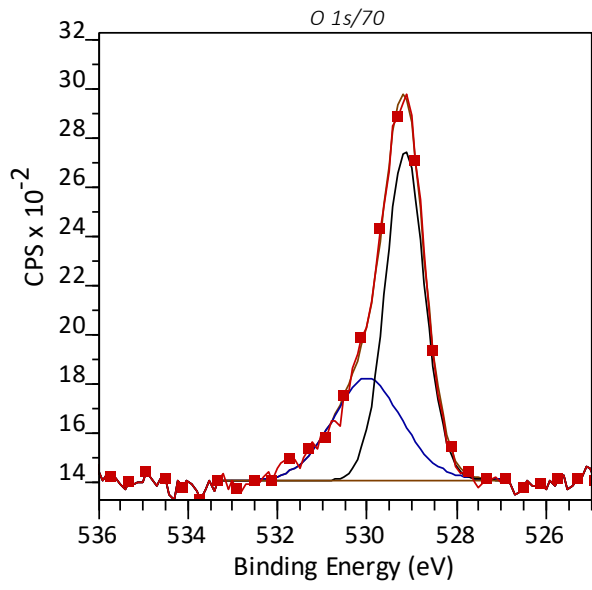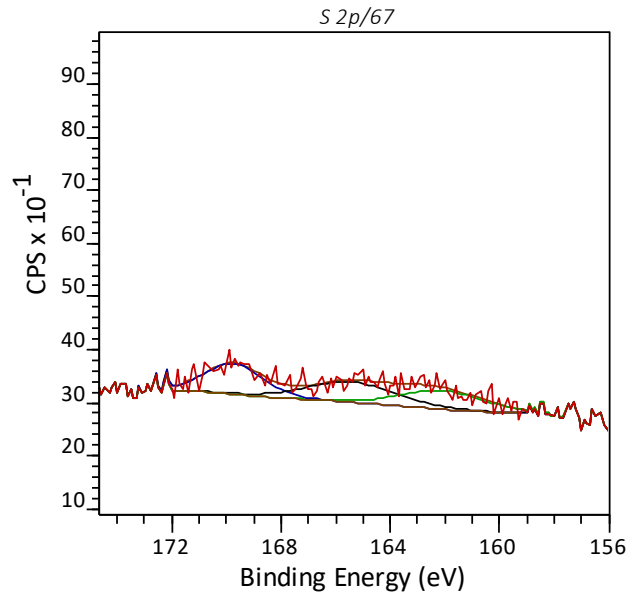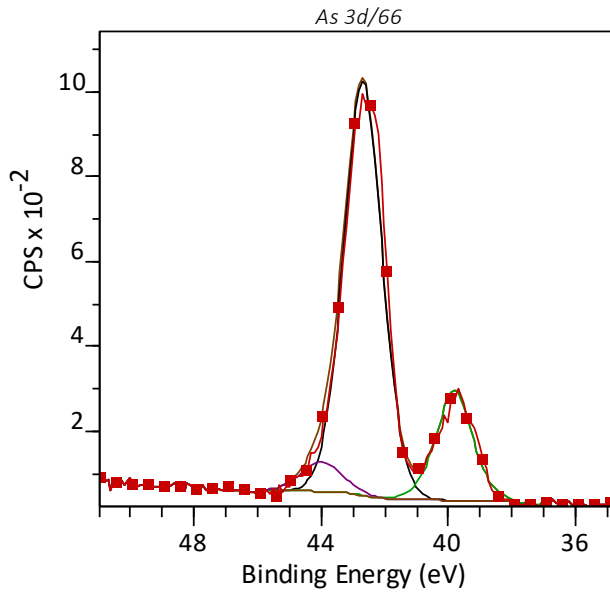

(k) Sample #20 – 5.0 % O<sub>2</sub>-50 % SO<sub>2</sub>; t = 133-158 °C.

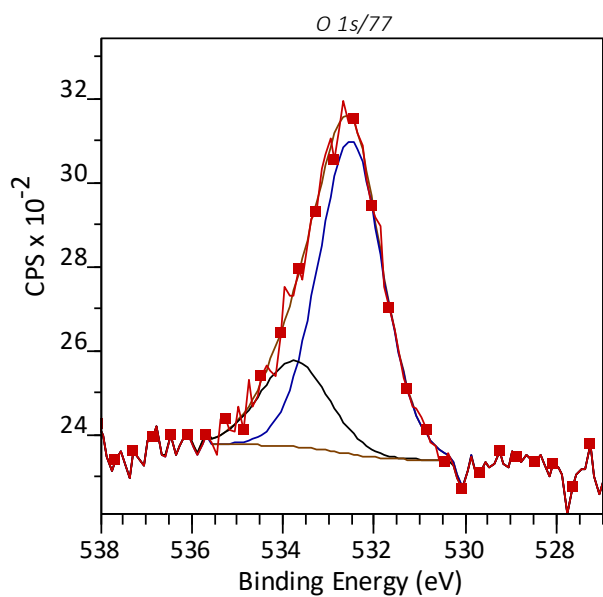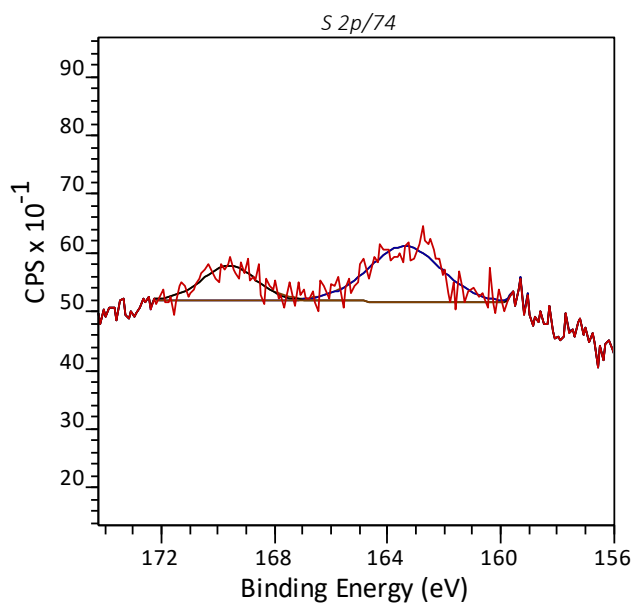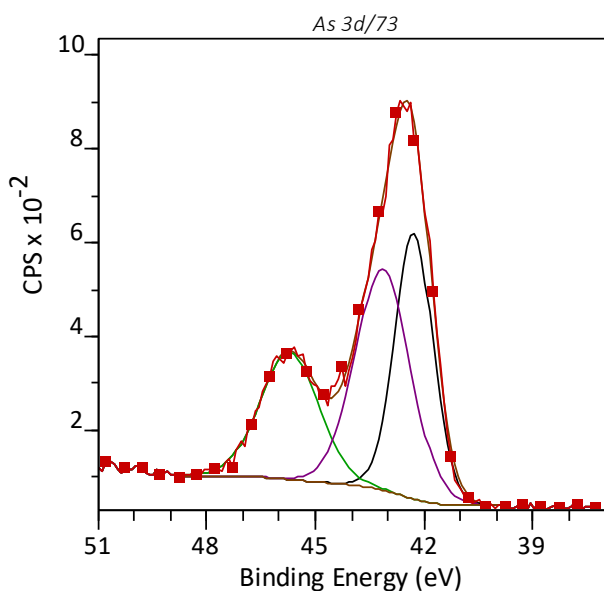

(I) Sample #22 – 5.0 % O<sub>2</sub>-50 % SO<sub>2</sub>; t = 187-222 °C.

#### References:

1. Gisby J., Taskinen P., Pihlasalo J., Li Z., Tyrer M., Pearce J., Avarmaa K., Björklund P., Davies H., Korpi M., Martin S., Pesonen L., Robinson J.: *Metall. Mater. Trans. B*, 2017, vol. 48B (1), 91-98.
2. Davies, R. H., Dinsdale, A. T., Gisby, J. A., Robinson, J. A. J., Martin, A. M.: *Calphad*, 2002, vol. 26 (2), 229-27.
